# Supplementary material for: Reliability and validity of neurobehavioral function on the Psychology Experimental Building Language test battery in young adults
Source: PubMed Central journal article supplement (PMC4690381; doi:10.7717/peerj.1460), 2015-12-22
Supplement: peerj-03-1460-s002.pdf [file peerj-03-1460-s002.pdf]

1 **Supplemental Table 1.** Selected peer-reviewed publications using the Psychology Experiment Building Language (PEBL) software.  
 2 Berg/Wisconsin Card Sorting Test (BCST); Delayed Match to Sample (DMS); Implicit Association Task (IAT); Iowa Gambling Task  
 3 (IGT); Psychomotor Vigilance Task (PVT); Situation Awareness Task (SAT); Time-Wall (TW); Tower of London (ToL); and Trail  
 4 Making Test (TMT).  
 5

---

| 6  | 7 <u>Topic</u>                    | <u>1<sup>st</sup> Author</u> | <u>Year</u> | <u>Citation</u>                                                    | <u>PEBL Test(s)</u>        |
|----|-----------------------------------|------------------------------|-------------|--------------------------------------------------------------------|----------------------------|
| 8  | Description of PEBL               | Mueller                      | 2010        | <i>International J of Machine Consciousness</i> <b>2</b> : 273-288 | TMT, IGT,<br>9 many others |
| 10 | Pursuit rotor in children         | Piper                        | 2010        | <i>J Neuroscience Methods</i> <b>195</b> :88-91                    | Pursuit Rotor              |
| 11 | Alcohol & decision making         | Lyvers                       | 2010        | <i>Addictive Behaviors</i> <b>35</b> : 1021-1028                   | BCST                       |
| 12 | Anxiety & decision making         | de Visser                    | 2010        | <i>Neuropsychologia</i> <b>48</b> :1598-1606                       | BCST                       |
| 13 | Caffeine & decision making        | Aggarwal                     | 2011        | <i>British J Surgery</i> <b>98</b> : 1666-1672                     | Stroop, BCST,<br>14 PVT    |
| 15 | Behavioral genetics of glutamate  | Ness                         | 2011        | <i>Neuropharmacology</i> <b>61</b> :950-956                        | IGT                        |
| 16 | Heavy drinkers & decision making  | Gullo                        | 2011        | <i>Drug &amp; Alcohol Dependence</i> <b>117</b> :204-210           | Digit span                 |
| 17 | Behavioral genetics & amphetamine | Wardle                       | 2012        | <i>Genes, Brain &amp; Behavior</i> <b>12</b> :13-20                | BCST, N-back               |
| 18 | Schizotypy & cognition            | Cappe                        | 2012        | <i>Psychiatry Research</i> <b>200</b> :652-659                     | BCST                       |
| 19 | Brain damage & strategy updating  | Danckert                     | 2012        | <i>Cerebral Cortex</i> <b>22</b> :2745-2760                        | BCST                       |
| 20 | Multiple sclerosis and cognition  | Kalinowska                   | 2012        | <i>J of Neurological Sciences</i> <b>321</b> : 43-48               | reaction-time              |
| 21 | Executive function & lifespan     | Piper                        | 2012        | <i>Behavior Research Methods</i> <b>44</b> : 110-123               | BCST, TMT,<br>22 ToL, TW   |
| 23 | Aging & executive function        | Zebrowitz                    | 2013        | <i>Psychology &amp; Aging</i> <b>28</b> : 202-212                  | BCST                       |
| 24 | Transcranial Infrared Laser       | Barrett                      | 2013        | <i>Neuroscience</i> <b>230</b> : 13-23                             | PVT, DMS                   |

|    |                                  |          |      |                                                    |               |
|----|----------------------------------|----------|------|----------------------------------------------------|---------------|
| 25 | Obsessive Compulsive Disorder    | Tumkaya  | 2013 | <i>Psychiatry Research</i> <b>209</b> : 579-588    | SAT           |
| 26 | Wilson's disease & decisions     | Ma       | 2013 | <i>J Clin Exp Neuropsychol</i> <b>35</b> : 472-479 | BCST          |
| 27 | Alcohol consumption & decisions  | Bowley   | 2013 | <i>Int J Psychophysiology</i> <b>89</b> : 342-348  | IAT           |
| 28 | Essential tremor & cognition     | Bhalsing | 2014 | <i>Eur J Neurology</i> <b>21</b> ; 874-883         | BCST          |
| 29 | Tourette's & motor skill         | Brandt   | 2014 | <i>PLoS One</i> <b>9</b> : e98417                  | Pursuit Rotor |
| 30 | Executive function & Parkinson's | Cohen    | 2014 | <i>J Parkinson's Dis</i> <b>4</b> : 111-122        | BCST          |
| 31 | Hoarders and cognition           | Raines   | 2014 | <i>J Affect Dis</i> <b>166</b> : 30-35             | CPT           |
| 32 | Sex differences                  | Evans    | 2015 | <i>Brain &amp; Cogn</i> <b>93</b> : 42-53          | IGT           |
| 33 | Decision making & alcohol        | Lyvers   | 2015 | <i>Addict Behav</i> <b>41</b> : 129-135            | IGT           |

34

35 \* For an updated list, see: [http://pebl.sourceforge.net/wiki/index.php/Publications\\_citing\\_PEBL](http://pebl.sourceforge.net/wiki/index.php/Publications_citing_PEBL)

36

37 **Supplemental Table 2.** Comparison of the antecedents to measures contained in the Psychology Experiment Building Language  
 38 (PEBL) battery including the originator(s), year of key publication, construct measured, and title for PEBL version. Berg Card Sorting  
 39 Test (BCST); Executive Function (EF); Iowa Gambling Task (IGT); Mental Rotation Test (MRT); Tower of London (ToL); Test  
 40 Attentional Vigilance (TOAV); Trail Making Test (TMT)

---

| 42 | <u>Test</u>                    | <u>Originator</u>      | <u>Year</u> | <u>Construct</u>      | <u>PEBL Version</u> |
|----|--------------------------------|------------------------|-------------|-----------------------|---------------------|
| 43 | Digit Span                     | Alfred Binet           | 1905        | working memory        | Digit Span          |
| 44 | Rotary Pursuit                 | Robert Ammons          | 1947        | procedural learning   | Pursuit Rotor       |
| 45 | Wisconsin Card Sorting Test    | David Grant; Esta Berg | 1948        | EF: set shifting      | BCST                |
| 46 | TMT                            | Ralph Reitan           | 1955        | EF: divided attention | TMT                 |
| 47 | MRT                            | Roger Shepard          | 1978        | EF: decision making   | MRT                 |
| 48 | ToL                            | Tim Shallice           | 1983        | EF: planning          | ToL                 |
| 49 | Test of Variables of Attention | Lawrence Greenberg     | 1993        | sustained attention   | TOAV                |
| 50 | IGT                            | Antoine Bechara        | 1994        | decision making       | IGT                 |

---

51

52

53 **Supplemental Table 3.** Mean performance and correlation between test sessions on Psychology Experiment Building Language  
 54 measures. The number of participants is listed in ( ) after each test; <sup>r</sup>reported previously<sup>47</sup>; Coded according to the <sup>O</sup>Oringal Berg  
 55 sorting rules or the <sup>H</sup>Heaton rules; <sup>A</sup>t-test  $P \leq .01$  versus test; <sup>B</sup>correlation  $P < .01$ .

|    | Test                                                       |            | Retest      |                   | %                 | Cohen's  | Correlation      |                  |                  |
|----|------------------------------------------------------------|------------|-------------|-------------------|-------------------|----------|------------------|------------------|------------------|
|    | <u>Mean</u>                                                | <u>SEM</u> | <u>Mean</u> | <u>SEM</u>        | <u>Difference</u> | <u>d</u> | <u>Pearson r</u> | <u>rho</u>       |                  |
| 60 | Rotary Pursuit (76)                                        |            |             |                   |                   |          |                  |                  |                  |
| 61 | Total time (sec)                                           | 37.9       | 1.1         | 43.7 <sup>A</sup> | 0.9               | +15.4    | .60              | .86 <sup>B</sup> | .81 <sup>B</sup> |
| 62 | Error (pixels)                                             | 31.7       | 3.3         | 24.7              | 2.7               | -22.0    | .24              | .59 <sup>B</sup> | .77 <sup>B</sup> |
| 63 | Trail Making Test (78)                                     |            |             |                   |                   |          |                  |                  |                  |
| 64 | Time A (sec) <sup>f</sup>                                  | 16.5       | 0.3         | 15.4 <sup>A</sup> | 0.3               | -6.6     | .07              | .74 <sup>B</sup> | .71 <sup>B</sup> |
| 65 | Time B (sec) <sup>f</sup>                                  | 22.1       | 0.5         | 19.3 <sup>A</sup> | 0.5               | -12.8    | .13              | .61 <sup>B</sup> | .56 <sup>B</sup> |
| 66 | Ratio (B/A)                                                | 1.35       | 0.03        | 1.25 <sup>A</sup> | 0.02              | -7.2     | .07              | .39 <sup>B</sup> | .35 <sup>B</sup> |
| 67 | Digit Span Forward (72)                                    | 12.2       | 0.48        | 13.0              | 0.44              | +6.6     | .20              | .63 <sup>B</sup> | .62 <sup>B</sup> |
| 68 | Test of Attentional Vigilance (68)                         |            |             |                   |                   |          |                  |                  |                  |
| 69 | Response Time                                              | 385.4      | 4.8         | 395.2             | 7.7               | +2.5     | .25              | .79 <sup>B</sup> | .72 <sup>B</sup> |
| 70 | SD of Response Time                                        | 109.8      | 5.3         | 98.9 <sup>A</sup> | 6.7               | -9.9     | .25              | .87 <sup>B</sup> | .69 <sup>B</sup> |
| 71 | Omission Errors                                            | 8.1        | 1.9         | 5.7               | 1.4               | -30.2    | .16              | .88 <sup>B</sup> | .43 <sup>B</sup> |
| 72 | Commission Errors                                          | 16.9       | 1.1         | 13.8              | 1.3               | -18.3    | .34              | .65 <sup>B</sup> | .66 <sup>B</sup> |
| 73 | Tower of London (66)                                       |            |             |                   |                   |          |                  |                  |                  |
| 74 | Moves                                                      | 8.9        | 0.2         | 9.0               | 0.3               | +1.3     | .09              | .15              | .34 <sup>B</sup> |
| 75 | Time (sec)                                                 | 16.8       | 0.5         | 14.1 <sup>A</sup> | 0.5               | -16.0    | .62              | .36 <sup>B</sup> | .48 <sup>B</sup> |
| 76 | Iowa Gambling Task (68)                                    |            |             |                   |                   |          |                  |                  |                  |
| 77 | Response pattern                                           | 8.8        | 2.9         | 18.2 <sup>A</sup> | 3.5               | +106.3   | .39              | .41 <sup>B</sup> | .22              |
| 78 | Money                                                      | 1944.8     | 85.0        | 2162.1            | 116.0             | +11.2    | .31              | .10              | -.01             |
| 79 | Berg Card Sorting Test (73 <sup>O</sup> /60 <sup>H</sup> ) |            |             |                   |                   |          |                  |                  |                  |
| 80 | Categories Completed <sup>O</sup>                          | 3.1        | 0.2         | 3.6 <sup>A</sup>  | 0.2               | +16.0    | .39              | .51 <sup>B</sup> | .47 <sup>B</sup> |
| 81 | Errors (%) <sup>O</sup>                                    | 30.0       | 1.7         | 22.0 <sup>A</sup> | 1.6               | -26.7    | .55              | .69 <sup>B</sup> | .68 <sup>B</sup> |
| 82 | Perseverative responses <sup>O</sup> (%)                   | 30.7       | 0.9         | 31.1              | 1.0               | -1.3     | .05              | .03              | .00              |
| 83 | Perseverative errors <sup>O</sup> (%)                      | 14.9       | 0.8         | 12.2 <sup>A</sup> | 0.9               | -18.2    | .41              | .45 <sup>B</sup> | .35 <sup>B</sup> |
